# Supplementary material for: Potential mechanism of action ofIxeris sonchifoliaextract injection against cardiovascular diseases revealed by combination of HPLC-Q-TOF-MS, virtual screening and systems pharmacology approach
Source: Royal Society of Chemistry journal article supplement (doi:10.1039/d0ra07038f), 2020-01-01
Supplement: d0ra07038f1.pdf [file d0ra07038f1.pdf]

**Table S1:** Potential targets information of KDZ injection

| ID   | Target Name                           | UniPort ID | Name  | Related disease                                                                                                                                                                                |
|------|---------------------------------------|------------|-------|------------------------------------------------------------------------------------------------------------------------------------------------------------------------------------------------|
| T-01 | Phenylalanine-4-hydroxylase           | P00439     | PAH   | tyrosinemia; heart defects congenital; metabolic diseases; enzyme deficiency                                                                                                                   |
| T-02 | Epidermal growth factor receptor      | P00533     | EGFR  | restenosis; Prothrombin Thrombophilia; stroke, ischemic; acute myocardial infarction; elevated plasma prothrombin levels and an increase; cerebrovascular disease,                             |
| T-03 | Prothrombin                           | P00734     | F2    | ischemic; metabolism disorders; Vascular Disease; thrombotic diseases; restenosis; atherosclerosis, coronary; coronary ischaemic syndrome; heart anomalies, congenita; coronary artery disease |
| T-04 | Coagulation factor X                  | P00742     | F10   |                                                                                                                                                                                                |
| T-05 | Complement factor D                   | P00746     | CFD   |                                                                                                                                                                                                |
| T-06 | Plasminogen                           | P00747     | PLG   | pathologic neovascularization; coronary arteriosclerosis; ischemia; myocardial ischemia; thrombosis; cardiovascular diseases                                                                   |
| T-07 | Urokinase-type plasminogen activator  | P00749     | PLAU  | atheroma; thrombosis; mitral valve prolapse                                                                                                                                                    |
| T-08 | Carbonic anhydrase 2                  | P00918     | CA2   | Vascular Disease                                                                                                                                                                               |
| T-09 | L-lactate dehydrogenase B chain       | P07195     | LDHB  |                                                                                                                                                                                                |
| T-10 | Cathepsin B                           | P07858     | CTSB  |                                                                                                                                                                                                |
| T-11 | Insulin-like growth factor 1 receptor | P08069     | IGF1R | left ventricular hypertrophy; pathologic neovascularization; cardiac growth; cholesterol, HDL   triglycerides                                                                                  |

|      |                                                                 |        |       |                                                                                                                                                                                                                                                                          |
|------|-----------------------------------------------------------------|--------|-------|--------------------------------------------------------------------------------------------------------------------------------------------------------------------------------------------------------------------------------------------------------------------------|
|      |                                                                 |        |       | cholesterol, total; myocardial infarct; plasma lipid levels; triglycerides<br>  atherosclerosis, coronary   lipoprotein; heart disease, ischemic; atherosclerosis, coronary   diabetes, type 2   lipoprotein; cholesterol   cholesterol, LDL   lipoproteins   fatty acid |
| T-12 | Coagulation factor VII                                          | P08709 | F7    |                                                                                                                                                                                                                                                                          |
| T-13 | Glutathione S-transferase P                                     | P09211 | GSTP1 |                                                                                                                                                                                                                                                                          |
| T-14 | Androgen receptor                                               | P10275 | AR    |                                                                                                                                                                                                                                                                          |
| T-15 | Pyruvate dehydrogenase E1 component subunit beta, mitochondrial | P11177 | PDHB  |                                                                                                                                                                                                                                                                          |
| T-16 | Alcohol dehydrogenase class-3                                   | P11766 | ADH5  |                                                                                                                                                                                                                                                                          |
| T-17 | Proto-oncogene tyrosine-protein kinase Src                      | P12931 | SRC   |                                                                                                                                                                                                                                                                          |
| T-18 | Macrophage migration inhibitory factor                          | P14174 | MIF   | atheroma; restenosis; coronary disease; IL-12 production from monocyte                                                                                                                                                                                                   |
| T-19 | Ras-related C3 botulinum toxin substrate 2                      | P15153 | RAC2  |                                                                                                                                                                                                                                                                          |
| T-20 | Bone morphogenetic protein 7                                    | P18075 | BMP7  |                                                                                                                                                                                                                                                                          |
| T-21 | Thymidine phosphorylase                                         | P19971 | TYMP  | mitochondrial diseases; pathologic neovascularization                                                                                                                                                                                                                    |
| T-22 | Liver carboxylesterase 1                                        | P23141 | CES1  |                                                                                                                                                                                                                                                                          |
| T-23 | Chymase                                                         | P23946 | CMA1  | cardiovascular diseases; atheroma; heart failure; HDL Cholesterol; left ventricular hypertrophy                                                                                                                                                                          |
| T-24 | Cathepsin S                                                     | P25774 | CTSS  |                                                                                                                                                                                                                                                                          |

|      |                                                        |        |        |                                                                                                                                                                                            |
|------|--------------------------------------------------------|--------|--------|--------------------------------------------------------------------------------------------------------------------------------------------------------------------------------------------|
| T-25 | Amine oxidase [flavin-containing] B                    | P27338 | MAOB   | ischemia; cerebrovascular disorders;<br>effects cardiovascular                                                                                                                             |
| T-26 | Nitric oxide synthase, endothelial                     | P29474 | NOS3   |                                                                                                                                                                                            |
| T-27 | Phosphoenolpyruvate carboxykinase,<br>cytosolic [GTP]  | P35558 | PCK1   |                                                                                                                                                                                            |
| T-28 | Vascular endothelial growth factor<br>receptor 2       | P35968 | KDR    |                                                                                                                                                                                            |
| T-29 | TGF-beta receptor type-1                               | P36897 | TGFR1  |                                                                                                                                                                                            |
| T-30 | Caspase-3                                              | P42574 | CASP3  | cerebral ischemia; ischemic brain injury                                                                                                                                                   |
| T-31 | Mitogen-activated protein kinase 8                     | P45983 | MAPK8  |                                                                                                                                                                                            |
| T-32 | Glycogen synthase kinase-3 beta                        | P49841 | GSK3B  |                                                                                                                                                                                            |
| T-33 | Death-associated protein kinase 1                      | P53355 | DAPK1  | ischemia                                                                                                                                                                                   |
| T-34 | Mitogen-activated protein kinase 10                    | P53779 | MAPK10 | thrombosis, deep veinlipid metabolism<br>disorder; cardiomegaly; Thrombin<br>activatable fibrinolysis inhibitor; angina;<br>atherosclerosis, coronary;<br>Hyperprothrombinemia; restenosis |
| T-35 | Triosephosphate isomerase                              | P60174 | TPI1   | metabolic diseases                                                                                                                                                                         |
| T-36 | Troponin C, slow skeletal and cardiac<br>muscles       | P63316 | TNNC1  |                                                                                                                                                                                            |
| T-37 | Peroxisome proliferator-activated<br>receptor alpha    | Q03181 | PPAR   |                                                                                                                                                                                            |
| T-38 | Aldo-keto reductase family 1 member<br>C1              | Q04828 | AKR1C1 |                                                                                                                                                                                            |
| T-39 | Hydroxyacyl-coenzyme A<br>dehydrogenase, mitochondrial | Q16836 | HADH   |                                                                                                                                                                                            |

---

**Table S2:** Comparison of molecular docking results in the top 10.

| <b>Sybyl-X 1.3</b> |             |         | <b>Autodock Vina</b> |                          |
|--------------------|-------------|---------|----------------------|--------------------------|
| Compound–Target    | Total Score | C Score | Compound–Target      | Vina Score<br>(kcal/mol) |
| KDZ-6 – MIF        | 11.39       | 4       | KDZ-6 – MAOB         | -11.2                    |
| KDZ-6 – MAOB       | 10.68       | 4       | KDZ-8 – CA2          | -10.9                    |
| KDZ-6 – MAPK8      | 10.32       | 5       | KDZ-3 – MAOB         | -10.8                    |
| KDZ-7 – SRC        | 9.95        | 4       | KDZ-8 – AKR1C1       | -10.8                    |
| KDZ-6 – GSTP1      | 9.53        | 4       | KDZ-4 – CA2          | -10.7                    |
| KDZ-6 – PPARD      | 9.39        | 5       | KDZ-6 – CA2          | -10.7                    |
| KDZ-6 – RAC2       | 9.28        | 4       | KDZ-10 – MAOB        | -10.7                    |
| KDZ-6 – AKR1C1     | 9.17        | 4       | KDZ-6 – AKR1C1       | -10.6                    |
| KDZ-6 – LDHB       | 9.07        | 4       | KDZ-9 – MAOB         | -10.5                    |
| KDZ-7 – MIF        | 8.93        | 5       | KDZ-10 – CA2         | -10.5                    |
